# Supplementary material for: Visceral Adipose Tissue Phospholipid Signature of Insulin Sensitivity and Obesity
Source: PubMed Central journal article supplement (PMC8631729; doi:10.1021/acs.jproteome.0c00918), 2021-03-24
Supplement: pr0c00918_si_001.pdf [file pr0c00918_si_001.pdf]

Supporting Information File

**Visceral adipose tissue phospholipid signature of insulin sensitivity and obesity.**

**Magalí Palau-Rodriguez<sup>a,b†</sup>, Anna Marco-Ramell<sup>a,b†</sup>, Patricia Casas-Agustench<sup>a,b</sup>,  
Sara Tulipani<sup>a,c</sup>, Antonio Miñarro<sup>b,d</sup>, Alex Sanchez-Pla<sup>b,d,e</sup>, Mora Murri<sup>c,f</sup>,  
Francisco J Tinahones<sup>c,f\*</sup>, Cristina Andres-Lacueva<sup>a,b\*</sup>**

<sup>†</sup> equal contribution

<sup>a</sup>Biomarkers and Nutrimetabolomics Laboratory, Department of Nutrition, Food Sciences and Gastronomy, XaRTA, INSA, Faculty of Pharmacy and Food Sciences, University of Barcelona, Barcelona 08028, Spain

<sup>b</sup>CIBER Fragilidad y Envejecimiento Saludable (CIBERfes), Instituto de Salud Carlos III, Barcelona 08028, Spain

<sup>c</sup> Department of Endocrinology and Nutrition, Instituto de Investigación Biomédica de Malaga (IBIMA), Virgen de la Victoria University Hospital, Málaga University, Malaga 2910, Spain

<sup>d</sup>Genetics, Microbiology and Statistics Department, Biology Faculty, University of Barcelona, Barcelona 08028, Spain

<sup>e</sup>Statistics and Bioinformatics Unit, Vall d'Hebron Institut de Recerca (VHIR), Barcelona 08035, Spain

<sup>f</sup>CIBER Fisiopatología de la Obesidad y Nutrición (CIBERObn), Instituto de Salud  
Carlos III, Madrid 28029, Spain

\*Corresponding authors:

**Dr. Cristina Andres Lacueva.** Biomarkers and Nutrimetabolomics  
Laboratory, Department of Nutrition, Food Sciences and Gastronomy,  
Faculty of Pharmacy and Food Sciences, University of Barcelona  
Av. Joan XXIII, 27-31, 08028, Barcelona, Spain.  
Phone: +34.934034840; Fax: +34.93403593.

Email address: [candres@ub.edu](mailto:candres@ub.edu)

**Dr. Francisco J Tinahones.** Department of Endocrinology and Nutrition, Instituto de  
Investigación Biomédica de Malaga (IBIMA), Virgen de la Victoria University  
Hospital, Málaga University, 2910, Malaga, Spain.

Phone: +34.951932734

Email address: [fjtinahones@uma.es](mailto:fjtinahones@uma.es)

## Supporting information

**Supplemental Figure S1.** Stratification of the groups and multimetabolite biomarker.

**Supplemental Table S1.** Statistical significance of discriminative metabolites according to the patient group in obesity, high IR, interaction of both metabolic statuses and discordant phenotypes of both.

**Supplemental Table S2.** Enrichment analysis of the metabolic pathways altered in obesity.

**Supplemental Table S3.** The most discriminative metabolites in VAT in obesity obtained from multivariate RF analysis.

**Supplemental Figure S1.** Stratification of the groups and multimetabolite biomarker.

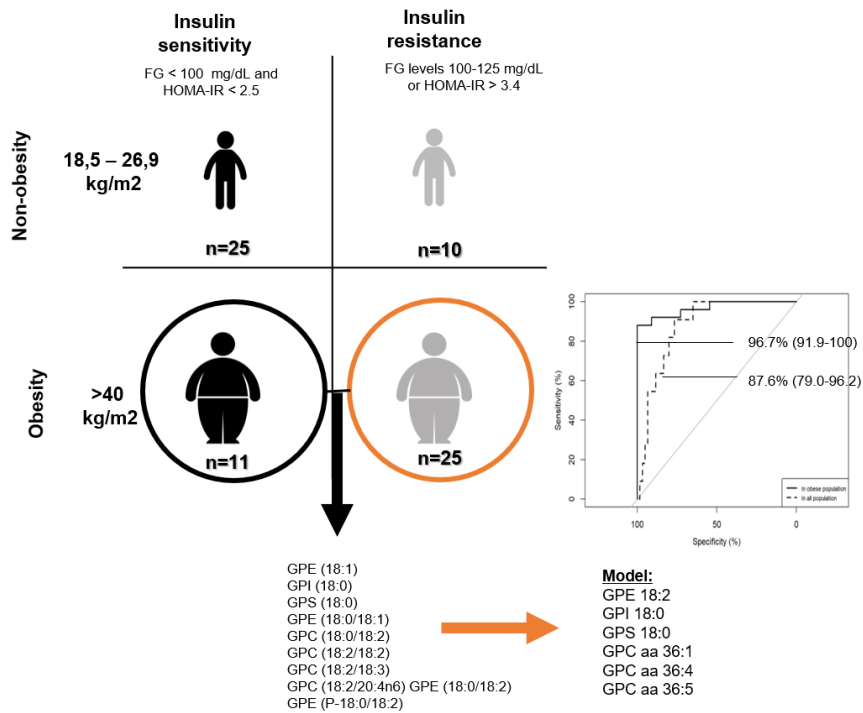

**Supplemental Table S1.** Statistical significance of discriminative metabolites according to the patient group in obesity, high IR, interaction of both metabolic statuses and discordant phenotypes of both. *P* values were corrected for multiple testing by the false discovery rate (adjusted *p* value) are. Metabolites are sorted alphabetically, according to their metabolic pathway. Abbreviations: IR, insulin resistance; IS, insulin sensitivity; OB, obesity; n.s., not significant. \*Compounds identified with a very high level of confidence, but not validated with a standard; # *p* value <0.01 (raw *p* value).

| Metabolites                            | Metabolic pathway                        | Adjusted <i>p</i> value |         |              |              |                       |                  |
|----------------------------------------|------------------------------------------|-------------------------|---------|--------------|--------------|-----------------------|------------------|
|                                        |                                          | OB                      | High IR | OB x high IR | OB, IS vs IR | high IR, Non-OB vs OB | Non-OB, IS vs IR |
| <u>Amino acids</u>                     |                                          |                         |         |              |              |                       |                  |
| N-Acetylalanine                        | Alanine and Aspartate Metabolism         | 0.036                   | n.s.    | n.s.         | n.s.         | n.s.                  | n.s.             |
| N-Acetylasparagine                     | Alanine and Aspartate Metabolism         | 0.045                   | n.s.    | n.s.         | n.s.         | n.s.                  | n.s.             |
| Creatinine                             | Creatine Metabolism                      | 0.001                   | n.s.    | n.s.         | n.s.         | n.s.                  | n.s.             |
| Guanidinoacetate                       | Creatine Metabolism                      | 0.001                   | n.s.    | n.s.         | n.s.         | n.s.                  | n.s.             |
| Beta-Citrylglutamate                   | Glutamate Metabolism                     | 0.014                   | n.s.    | n.s.         | n.s.         | 0.034                 | n.s.             |
| Glutamine                              | Glutamate Metabolism                     | 0.013                   | n.s.    | n.s.         | n.s.         | n.s.                  | n.s.             |
| N-Acetylglutamate                      | Glutamate Metabolism                     | 1.92E-06                | n.s.    | n.s.         | n.s.         | 0.003                 | n.s.             |
| N-Acetylglutamine                      | Glutamate Metabolism                     | 0.002                   | n.s.    | n.s.         | n.s.         | 0.018                 | n.s.             |
| 2-Hydroxybutyrate/2-Hydroxyisobutyrate | Glutathione Metabolism                   | 2.34E-05                | n.s.    | n.s.         | n.s.         | 0.015                 | n.s.             |
| 5-Oxoproline                           | Glutathione Metabolism                   | 0.007                   | n.s.    | n.s.         | n.s.         | n.s.                  | n.s.             |
| Cysteine-Glutathione Disulfide         | Glutathione Metabolism                   | 7.79E-04                | n.s.    | n.s.         | n.s.         | 0.039                 | n.s.             |
| Glutathione, Reduced (GSH)             | Glutathione Metabolism                   | 0.017                   | n.s.    | n.s.         | n.s.         | n.s.                  | n.s.             |
| Ophthalmate                            | Glutathione Metabolism                   | 0.004                   | n.s.    | n.s.         | n.s.         | n.s.                  | n.s.             |
| Betaine                                | Glycine, Serine and Threonine Metabolism | 9.52E-04                | n.s.    | n.s.         | n.s.         | n.s.                  | n.s.             |
| Dimethylglycine                        | Glycine, Serine and Threonine Metabolism | 0.006                   | n.s.    | n.s.         | n.s.         | n.s.                  | n.s.             |
| Glycine                                | Glycine, Serine and Threonine Metabolism | 0.037                   | n.s.    | n.s.         | n.s.         | n.s.                  | n.s.             |
| N-Acetylglycine                        | Glycine, Serine and Threonine Metabolism | 0.008                   | n.s.    | n.s.         | n.s.         | n.s.                  | n.s.             |

|                               |                                                  |          |      |      |      |       |      |
|-------------------------------|--------------------------------------------------|----------|------|------|------|-------|------|
| N-Acetylthreonine             | Glycine, Serine and Threonine Metabolism         | 0.002    | n.s. | n.s. | n.s. | n.s.  | n.s. |
| 1-Methylhistidine             | Histidine Metabolism                             | 7.79E-04 | n.s. | n.s. | n.s. | 0.018 | n.s. |
| 1-Methylimidazoleacetate      | Histidine Metabolism                             | 0.002    | n.s. | n.s. | n.s. | n.s.  | n.s. |
| Histidine                     | Histidine Metabolism                             | 0.010    | n.s. | n.s. | n.s. | n.s.  | n.s. |
| Imidazole Lactate             | Histidine Metabolism                             | 0.004    | n.s. | n.s. | n.s. | n.s.  | n.s. |
| 2-Methylbutyrylcarnitine (C5) | Leucine, Isoleucine and Valine Metabolism        | 0.001    | n.s. | n.s. | n.s. | 0.045 | n.s. |
| 3-Methyl-2-Oxobutyrate        | Leucine, Isoleucine and Valine Metabolism        | 0.026    | n.s. | n.s. | n.s. | n.s.  | n.s. |
| 3-Methyl-2-Oxovalerate        | Leucine, Isoleucine and Valine Metabolism        | 0.023    | n.s. | n.s. | n.s. | n.s.  | n.s. |
| 4-Methyl-2-Oxopentanoate      | Leucine, Isoleucine and Valine Metabolism        | 0.019    | n.s. | n.s. | n.s. | n.s.  | n.s. |
| Alpha-Hydroxyisovalerate      | Leucine, Isoleucine and Valine Metabolism        | 2.74E-04 | n.s. | n.s. | n.s. | 0.018 | n.s. |
| Beta-Hydroxyisovalerate       | Leucine, Isoleucine and Valine Metabolism        | 0.005    | n.s. | n.s. | n.s. | n.s.  | n.s. |
| Isobutyrylcarnitine (C4)      | Leucine, Isoleucine and Valine Metabolism        | 3.04E-04 | n.s. | n.s. | n.s. | 0.048 | n.s. |
| Isoleucine                    | Leucine, Isoleucine and Valine Metabolism        | 0.034    | n.s. | n.s. | n.s. | n.s.  | n.s. |
| Isovalerylcarnitine (C5)      | Leucine, Isoleucine and Valine Metabolism        | 1.31E-04 | n.s. | n.s. | n.s. | n.s.  | n.s. |
| 2-Aminoadipate                | Lysine Metabolism                                | 0.021    | n.s. | n.s. | n.s. | n.s.  | n.s. |
| Pipecolate                    | Lysine Metabolism                                | 0.019    | n.s. | n.s. | n.s. | n.s.  | n.s. |
| Cysteine                      | Methionine, Cysteine, SAM and Taurine Metabolism | 0.002    | n.s. | n.s. | n.s. | 0.015 | n.s. |
| S-Adenosylhomocysteine (SAH)  | Methionine, Cysteine, SAM and Taurine Metabolism | 0.037    | n.s. | n.s. | n.s. | n.s.  | n.s. |
| S-Methylcysteine              | Methionine, Cysteine, SAM and Taurine Metabolism | 0.002    | n.s. | n.s. | n.s. | n.s.  | n.s. |
| Taurine                       | Methionine, Cysteine, SAM and Taurine Metabolism | 0.004    | n.s. | n.s. | n.s. | n.s.  | n.s. |
| Kynurenine                    | Tryptophan Metabolism                            | 0.003    | n.s. | n.s. | n.s. | n.s.  | n.s. |
| Tryptophan Betaine            | Tryptophan Metabolism                            | 0.004    | n.s. | n.s. | n.s. | n.s.  | n.s. |
| Citrulline                    | Urea cycle, Arginine and Proline Metabolism      | 0.034    | n.s. | n.s. | n.s. | n.s.  | n.s. |
| Ornithine                     | Urea cycle, Arginine and Proline Metabolism      | 0.010    | n.s. | n.s. | n.s. | n.s.  | n.s. |
| Proline                       | Urea cycle, Arginine and Proline Metabolism      | 0.038    | n.s. | n.s. | n.s. | n.s.  | n.s. |
| Trans-4-Hydroxyproline        | Urea cycle, Arginine and Proline Metabolism      | 0.045    | n.s. | n.s. | n.s. | n.s.  | n.s. |
| Urea                          | Urea cycle, Arginine and Proline Metabolism      | 5.18E-05 | n.s. | n.s. | n.s. | 0.018 | n.s. |
| <u>Carbohydrates</u>          |                                                  |          |      |      |      |       |      |
| Erythronate*                  | Aminosugar Metabolism                            | 0.001    | n.s. | n.s. | n.s. | n.s.  | n.s. |
| N-Acetylglucosamine/N-        | Aminosugar Metabolism                            | 0.011    | n.s. | n.s. | n.s. | n.s.  | n.s. |

|                                    |                                                      |          |      |      |      |       |      |      |
|------------------------------------|------------------------------------------------------|----------|------|------|------|-------|------|------|
| <u>Acetylgalactosamine</u>         |                                                      |          |      |      |      |       |      |      |
| N-Acetylglucosaminylasparagine     | Aminosugar Metabolism                                | 0.045    | n.s. | n.s. | n.s. | n.s.  | n.s. | n.s. |
| Mannose                            | Fructose, Mannose and Galactose Metabolism           | 3.94E-04 | n.s. | n.s. | n.s. | 0.018 | n.s. | n.s. |
| 1,5-Anhydroglucitol (1,5-AG)       | Glycolysis, Gluconeogenesis, and Pyruvate Metabolism | 0.003    | n.s. | n.s. | n.s. | n.s.  | n.s. | n.s. |
| 3-Phosphoglycerate                 | Glycolysis, Gluconeogenesis, and Pyruvate Metabolism | 0.003    | n.s. | n.s. | n.s. | 0.038 | n.s. | n.s. |
| Glucose                            | Glycolysis, Gluconeogenesis, and Pyruvate Metabolism | 0.027    | n.s. | n.s. | n.s. | n.s.  | n.s. | n.s. |
| Glycerate                          | Glycolysis, Gluconeogenesis, and Pyruvate Metabolism | 0.001    | n.s. | n.s. | n.s. | 0.045 | n.s. | n.s. |
| Lactate                            | Glycolysis, Gluconeogenesis, and Pyruvate Metabolism | 1.57E-05 | n.s. | n.s. | n.s. | 0.005 | n.s. | n.s. |
| Phosphoenolpyruvate (PEP)          | Glycolysis, Gluconeogenesis, and Pyruvate Metabolism | 0.018    | n.s. | n.s. | n.s. | n.s.  | n.s. | n.s. |
| <u>Cofactors and vitamins</u>      |                                                      |          |      |      |      |       |      |      |
| Threonate                          | Ascorbate and Aldarate Metabolism                    | 0.001    | n.s. | n.s. | n.s. | 0.043 | n.s. | n.s. |
| Heme                               | Hemoglobin and Porphyrin Metabolism                  | 0.010    | n.s. | n.s. | n.s. | 0.007 | n.s. | n.s. |
| N1-Methyl-2-Pyridone-5-Carboxamide | Nicotinate and Nicotinamide Metabolism               | 0.026    | n.s. | n.s. | n.s. | n.s.  | n.s. | n.s. |
| Alpha-Tocopherol                   | Tocopherol Metabolism                                | 0.002    | n.s. | n.s. | n.s. | n.s.  | n.s. | n.s. |
| Gamma-Tocopherol/Beta-Tocopherol   | Tocopherol Metabolism                                | 0.045    | n.s. | n.s. | n.s. | n.s.  | n.s. | n.s. |
| Threonate                          | Ascorbate and Aldarate Metabolism                    | 0.001    | n.s. | n.s. | n.s. | n.s.  | n.s. | n.s. |
| <u>Energy</u>                      |                                                      |          |      |      |      |       |      |      |
| Alpha-Ketoglutarate                | TCA Cycle                                            | 1.31E-04 | n.s. | n.s. | n.s. | 0.016 | n.s. | n.s. |
| Fumarate                           | TCA Cycle                                            | 0.013    | n.s. | n.s. | n.s. | n.s.  | n.s. | n.s. |
| Malate                             | TCA Cycle                                            | 0.011    | n.s. | n.s. | n.s. | n.s.  | n.s. | n.s. |
| Succinate                          | TCA Cycle                                            | 1.31E-04 | n.s. | n.s. | n.s. | 0.016 | n.s. | n.s. |
| Succinylcarnitine (C4-DC)          | TCA Cycle                                            | 0.045    | n.s. | n.s. | n.s. | n.s.  | n.s. | n.s. |
| <u>Lipids</u>                      |                                                      |          |      |      |      |       |      |      |
| Deoxycarnitine                     | Carnitine Metabolism                                 | 0.038    | n.s. | n.s. | n.s. | n.s.  | n.s. | n.s. |
| Ceramide (d18:1/14:0, d16:1/16:0)* | Ceramides                                            | 0.021    | n.s. | n.s. | n.s. | n.s.  | n.s. | n.s. |
| Stearoyl Ethanolamide              | Endocannabinoid                                      | 0.004    | n.s. | n.s. | n.s. | n.s.  | n.s. | n.s. |

|                                                  |                                              |          |      |      |       |       |      |
|--------------------------------------------------|----------------------------------------------|----------|------|------|-------|-------|------|
| Propionylcarnitine (C3)                          | Fatty Acid Metabolism (also BCAA Metabolism) | 0.026    | n.s. | n.s. | n.s.  | n.s.  | n.s. |
| 3-Hydroxybutyrylcarnitine (1)                    | Fatty Acid Metabolism(Acyl Carnitine)        | 0.013    | n.s. | n.s. | n.s.  | n.s.  | n.s. |
| Acetylcarnitine (C2)                             | Fatty Acid Metabolism(Acyl Carnitine)        | 0.010    | n.s. | n.s. | n.s.  | n.s.  | n.s. |
| Linoleoylcarnitine (C18:2)*                      | Fatty Acid Metabolism(Acyl Carnitine)        | 0.038    | n.s. | n.s. | n.s.  | n.s.  | n.s. |
| Myristoleoylcarnitine (C14:1)*                   | Fatty Acid Metabolism(Acyl Carnitine)        | n.s.     | n.s. | n.s. | n.s.  | 0.046 | n.s. |
| Oleoylcarnitine (C18:1)                          | Fatty Acid Metabolism(Acyl Carnitine)        | 0.009    | n.s. | n.s. | n.s.  | n.s.  | n.s. |
| Palmitoleoylcarnitine (C16:1)*                   | Fatty Acid Metabolism(Acyl Carnitine)        | n.s.     | n.s. | n.s. | n.s.  | 0.044 | n.s. |
| Palmitoylcarnitine (C16)                         | Fatty Acid Metabolism(Acyl Carnitine)        | 0.002    | n.s. | n.s. | n.s.  | 0.041 | n.s. |
| 2-Hydroxyglutarate                               | Fatty Acid, Dicarboxylate                    | 3.52E-04 | n.s. | n.s. | n.s.  | 0.016 | n.s. |
| Glycerol                                         | Glycerolipid Metabolism                      | 6.75E-04 | n.s. | n.s. | n.s.  | 0.015 | n.s. |
| Glycerol 3-Phosphate                             | Glycerolipid Metabolism                      | 0.003    | n.s. | n.s. | n.s.  | n.s.  | n.s. |
| Glycerophosphoglycerol                           | Glycerolipid Metabolism                      | 0.032    | n.s. | n.s. | n.s.  | n.s.  | n.s. |
| 3-Hydroxybutyrate (BHBA)                         | Ketone Bodies                                | 0.024    | n.s. | n.s. | n.s.  | n.s.  | n.s. |
| 1-Linoleoyl-GPE (18:2)*                          | Lysolipid                                    | 0.035    | n.s. | n.s. | 0.017 | 0.026 | n.s. |
| 1-Oleoyl-GPE (18:1)                              | Lysolipid                                    | n.s.     | n.s. | n.s. | n.s.# | n.s.  | n.s. |
| 1-Stearoyl-GPI (18:0)                            | Lysolipid                                    | n.s.     | n.s. | n.s. | n.s.# | n.s.  | n.s. |
| 1-Stearoyl-GPS (18:0)                            | Lysolipid                                    | n.s.     | n.s. | n.s. | n.s.# | n.s.  | n.s. |
| 1-(1-Enyl-Oleoyl)-2-Linoleoyl-GPE (P-18:1/18:2)* | Lysoplasmalogen                              | 2.74E-04 | n.s. | n.s. | n.s.  | 0.005 | n.s. |
| 1,2-Dilinoleoyl-GPC (18:2/18:2)                  | Phospholipid Metabolism                      | n.s.     | n.s. | n.s. | n.s.# | 0.045 | n.s. |
| 1-Linoleoyl-2-Arachidonoyl-GPC (18:2/20:4n6)*    | Phospholipid Metabolism                      | n.s.     | n.s. | n.s. | n.s.  | 0.045 | n.s. |
| 1-Linoleoyl-2-Linolenoyl-GPC (18:2/18:3)*        | Phospholipid Metabolism                      | n.s.     | n.s. | n.s. | n.s.# | 0.043 | n.s. |
| 1-Oleoyl-2-Linoleoyl-GPC (18:1/18:2)*            | Phospholipid Metabolism                      | 0.019    | n.s. | n.s. | n.s.  | n.s.  | n.s. |
| 1-Stearoyl-2-Linoleoyl-GPC (18:0/18:2)           | Phospholipid Metabolism                      | n.s.     | n.s. | n.s. | n.s.# | n.s.  | n.s. |
| 1-Stearoyl-2-Linoleoyl-GPE (18:0/18:2)           | Phospholipid Metabolism                      | n.s.     | n.s. | n.s. | n.s.# | n.s.  | n.s. |
| 1-Stearoyl-2-Oleoyl-GPC (18:0/18:1)              | Phospholipid Metabolism                      | 0.036    | n.s. | n.s. | n.s.# | n.s.  | n.s. |
| Choline                                          | Phospholipid Metabolism                      | 9.60E-04 | n.s. | n.s. | n.s.  | 0.045 | n.s. |
| Glycerophosphoserine*                            | Phospholipid Metabolism                      | 0.014    | n.s. | n.s. | n.s.  | n.s.  | n.s. |



|                                                        |                                        |          |       |      |       |       |      |
|--------------------------------------------------------|----------------------------------------|----------|-------|------|-------|-------|------|
| 1-(1-Enyl-Palmitoyl)-2-Linoleoyl-GPE (P-16:0/18:2)*    | Plasmalogen                            | 0.030    | n.s.  | n.s. | n.s.  | n.s   | n.s. |
| 1-(1-Enyl-Palmitoyl)-2-Palmitoleoyl-GPC (P-16:0/16:1)* | Plasmalogen                            | 0.026    | n.s.  | n.s. | n.s.  | n.s.  | n.s. |
| 1-(1-Enyl-Stearoyl)-2-Linoleoyl-GPE (P-18:0/18:2)*     | Plasmalogen                            | 3.52E-04 | n.s.# | n.s. | n.s.# | 0.045 | n.s. |
| 1-(1-Enyl-Stearoyl)-2-Oleoyl-GPE (P-18:0/18:1)         | Plasmalogen                            | 0.005    | n.s.  | n.s. | n.s.  | n.s   | n.s. |
| Arachidonate (20:4n6)                                  | Polyunsaturated Fatty Acid (n3 and n6) | 0.008    | n.s.  | n.s. | n.s.  | n.s.  | n.s. |
| Docosahexaenoate (DHA, 22:6n3)                         | Polyunsaturated Fatty Acid (n3 and n6) | 0.013    | n.s.  | n.s. | n.s.  | n.s.  | n.s. |
| Docosapentaenoate (DPA, 22:5n3)                        | Polyunsaturated Fatty Acid (n3 and n6) | 0.008    | n.s.  | n.s. | n.s.  | 0.016 | n.s. |
| Docosapentaenoate (DPA, 22:5n6)                        | Polyunsaturated Fatty Acid (n3 and n6) | n.s.     | n.s.  | n.s. | n.s.  | 0.003 | n.s. |
| Glycosyl-N-Palmitoyl-Sphingosine (d18:1/16:0)          | Sphingolipid Metabolism                | 0.034    | n.s.  | n.s. | n.s.  | 0.047 | n.s. |
| Lactosyl-N-Nervonoyl-Sphingosine (d18:1/24:1)*         | Sphingolipid Metabolism                | 0.043    | n.s.  | n.s. | n.s.  | n.s.  | n.s. |
| N-Nervonoyl-Hexadecaphingosine (d16:1/24:1)*           | Sphingolipid Metabolism                | 0.020    | n.s.  | n.s. | n.s.  | n.s   | n.s. |
| N-Nervonoyl-Sphingadiene (d18:2/24:1)*                 | Sphingolipid Metabolism                | 1.21E-04 | n.s.  | n.s. | n.s.  | 0.045 | n.s. |
| N-Palmitoyl-Sphingadienine (d18:2/16:0)*               | Sphingolipid Metabolism                | 7.08E-04 | n.s.  | n.s. | n.s.  | 0.045 | n.s. |
| N-Stearoyl-Sphingadienine (d18:2/18:0)*                | Sphingolipid Metabolism                | 0.001    | n.s.  | n.s. | n.s.  | n.s   | n.s. |
| Sphingomyelin (d17:2/16:0, d18:2/15:0)*                | Sphingolipid Metabolism                | 0.036    | n.s.  | n.s. | n.s.  | n.s.  | n.s. |
| Sphingomyelin (d18:1/18:1, d18:2/18:0)                 | Sphingolipid Metabolism                | 0.004    | n.s.  | n.s. | n.s.  | n.s   | n.s. |
| Sphingomyelin (d18:1/20:1, d18:2/20:0)*                | Sphingolipid Metabolism                | 0.038    | n.s.  | n.s. | n.s.  | n.s.  | n.s. |
| Sphingomyelin (d18:1/22:2, d18:2/22:1, d16:1/24:2)*    | Sphingolipid Metabolism                | 0.002    | n.s.  | n.s. | n.s.  | 0.043 | n.s. |
| Sphingomyelin (d18:2/14:0, d18:1/14:1)*                | Sphingolipid Metabolism                | 0.044    | n.s.  | n.s. | n.s.  | n.s.  | n.s. |
| Sphingomyelin (d18:2/16:0, d18:1/16:1)*                | Sphingolipid Metabolism                | 0.025    | n.s.  | n.s. | n.s.  | n.s   | n.s. |

|                                         |                                                      |          |      |      |      |       |      |
|-----------------------------------------|------------------------------------------------------|----------|------|------|------|-------|------|
| Sphingomyelin (d18:2/24:1, d18:1/24:2)* | Sphingolipid Metabolism                              | 0.026    | n.s. | n.s. | n.s. | n.s.  | n.s. |
| Sphingomyelin (d18:2/24:2)*             | Sphingolipid Metabolism                              | 0.001    | n.s. | n.s. | n.s. | n.s.  | n.s. |
| 4-Cholesten-3-One                       | Sterol                                               | 0.011    | n.s. | n.s. | n.s. | n.s.  | n.s. |
| <u>Nucleotides</u>                      |                                                      |          |      |      |      |       |      |
| Hypoxanthine                            | Purine Metabolism, (Hypo)Xanthine/Inosine containing | 0.024    | n.s. | n.s. | n.s. | n.s.  | n.s. |
| Urate                                   | Purine Metabolism, (Hypo)Xanthine/Inosine containing | 3.24E-05 | n.s. | n.s. | n.s. | 0.018 | n.s. |
| Xanthine                                | Purine Metabolism, (Hypo)Xanthine/Inosine containing | 9.52E-04 | n.s. | n.s. | n.s. | n.s.  | n.s. |
| 7-Methylguanine                         | Purine Metabolism, Guanine containing                | 0.004    | n.s. | n.s. | n.s. | 0.003 | n.s. |
| 3-Ureidopropionate                      | Pyrimidine Metabolism, Uracil containing             | 0.003    | n.s. | n.s. | n.s. | 0.039 | n.s. |
| Pseudouridine                           | Pyrimidine Metabolism, Uracil containing             | 2.34E-05 | n.s. | n.s. | n.s. | 0.003 | n.s. |
| Uracil                                  | Pyrimidine Metabolism, Uracil containing             | 1.24E-04 | n.s. | n.s. | n.s. | 0.005 | n.s. |
| <u>Peptides</u>                         |                                                      |          |      |      |      |       |      |
| Glycylleucine                           | Dipeptide                                            | 0.038    | n.s. | n.s. | n.s. | n.s.  | n.s. |
| Phenylalanylglycine                     | Dipeptide                                            | 6.75E-04 | n.s. | n.s. | n.s. | 0.003 | n.s. |
| Gamma-Glutamylglutamine                 | Gamma-glutamyl Amino Acid                            | 8.62E-05 | n.s. | n.s. | n.s. | 0.018 | n.s. |
| Gamma-Glutamylthreonine                 | Gamma-glutamyl Amino Acid                            | 3.94E-04 | n.s. | n.s. | n.s. | 0.004 | n.s. |

**Supplemental Table S2.** Enrichment analysis of the metabolic pathways altered in obesity. Enrichment and p-value mirror the magnitude of the alteration of these pathways. Metabolic pathways are sorted according to the p-value of the alteration.

| Metabolic pathway                                   | Significant | Detected | Ratio S/D <sup>a</sup> | Ratio All S/D <sup>b</sup> | Enrichment | p-value <sup>c</sup> |
|-----------------------------------------------------|-------------|----------|------------------------|----------------------------|------------|----------------------|
| <b>OBESITY</b>                                      |             |          |                        |                            |            |                      |
| Leucine, isoleucine and valine metabolism           | 9           | 12       | 0.75                   | 0.28                       | 2.68       | 0.001                |
| Glutathione metabolism                              | 5           | 6        | 0.83                   | 0.28                       | 2.98       | 0.007                |
| TCA cycle                                           | 5           | 6        | 0.83                   | 0.28                       | 2.98       | 0.007                |
| Glycolysis, gluconeogenesis and pyruvate metabolism | 6           | 9        | 0.67                   | 0.28                       | 2.38       | 0.017                |
| Glycerolipid metabolism                             | 3           | 3        | 1.00                   | 0.28                       | 3.58       | 0.021                |
| Glycine, serine and threonine metabolism            | 5           | 8        | 0.63                   | 0.28                       | 2.24       | 0.042                |

- a) Ratio significant metabolites / detected metabolites in a particular metabolic pathway
- b) Ratio all significant metabolites (118) / all detected metabolite (422)
- c) Calculated with hypergeometric test

**Supplemental Table S3.** The most discriminative metabolites in VAT in obesity obtained from multivariate RF analysis. The smaller the VIP value is, the more discriminant the metabolite is. Metabolites are sorted according to their VIP value. Abbreviations: aa, acyl-acyl; ae, acyl-alkyl; PC, phosphatidylcholine; PE, phosphatidylethanolamine; VIP, variable importance in projection.

| VIP   | Name                                                                | Metabolic pathway                                    | Chemical class |
|-------|---------------------------------------------------------------------|------------------------------------------------------|----------------|
| 11.47 | Urate                                                               | Purine Metabolism, (Hypo)Xanthine/Inosine containing | Nucleotide     |
| 12.45 | Lactate                                                             | Glycolysis, Gluconeogenesis, and Pyruvate Metabolism | Carbohydrate   |
| 16.50 | N-Acetylglutamate                                                   | Glutamate Metabolism                                 | Amino acid     |
| 18.47 | Urea                                                                | Urea cycle, Arginine and Proline Metabolism          | Amino acid     |
| 25.02 | 2-Hydroxybutyrate/2-Hydroxyisobutyrate                              | Glutathione Metabolism                               | Amino acid     |
| 25.37 | Succinate                                                           | TCA Cycle                                            | Energy         |
| 27.49 | 1-(1-Enyl-Stearoyl)-2-Oleoyl-GPE (GPE ae 18:0/18:1,GPE ae 36:1)     | Plasmalogen                                          | Lipid          |
| 27.91 | 1-(1-Enyl-Stearoyl)-2-Linoleoyl-GPE (GPE ae 18:0/18:2, GPE ae 36:2) | Plasmalogen                                          | Lipid          |
| 35.45 | Alpha-Hydroxyisovalerate                                            | Leucine, Isoleucine and Valine Metabolism            | Amino acid     |
| 36.17 | Gamma-Glutamylglutamine                                             | Gamma-glutamyl Amino acid                            | Peptide        |
| 38.09 | Pseudouridine                                                       | Pyrimidine Metabolism, Uracil containing             | Nucleotide     |
| 39.63 | N-Nervonoyl-Sphingadiene (d18:2/24:1)*                              | Sphingolipid Metabolism                              | Lipid          |
| 40.93 | Uracil                                                              | Pyrimidine Metabolism, Uracil containing             | Nucleotide     |
| 42.88 | Erythronate*                                                        | Aminosugar Metabolism                                | Carbohydrate   |
| 49.20 | 1-(1-Enyl-Oleoyl)-2-Linoleoyl-GPE* (GPE ae 18:1/18:2, GPE ae 36:3)  | Lysoplasmalogen                                      | Lipid          |
| 49.95 | Glycerol                                                            | Glycerolipid Metabolism                              | Lipid          |
| 52.96 | Isobutyrylcarnitine (C4)                                            | Leucine, Isoleucine and Valine Metabolism            | Amino acid     |
| 53.49 | 1-Oleoyl-2-Linoleoyl-PC* (GPC aa 18:1/18:2, GPC aa 36:3)            | Phospholipid Metabolism                              | Lipid          |

|       |                          |                                                      |              |
|-------|--------------------------|------------------------------------------------------|--------------|
| 62.09 | Choline                  | Phospholipid Metabolism                              | Lipid        |
| 66.45 | 7-Methylguanine          | Purine Metabolism, Guanine containing                | Nucleotide   |
| 67.48 | Fumarate                 | TCA Cycle                                            | Energy       |
| 67.71 | Stearoyl Ethanolamide    | Endocannabinoid                                      | Lipid        |
| 73.92 | S-Methylcysteine         | Methionine, Cysteine, SAM and Taurine Metabolism     | Amino acid   |
| 74.33 | Alpha-Ketoglutarate      | TCA Cycle                                            | Energy       |
| 76.67 | Glycerate                | Glycolysis, Gluconeogenesis, and Pyruvate Metabolism | Carbohydrate |
| 77.67 | Glycerol 3-Phosphate     | Glycerolipid Metabolism                              | Lipid        |
| 79.10 | Isovalerylcarnitine (C5) | Leucine, Isoleucine and Valine Metabolism            | Amino acid   |
| 79.78 | Beta-Citrylglutamate     | Glutamate Metabolism                                 | Amino acid   |
| 81.65 | 5-Oxoproline             | Glutathione Metabolism                               | Amino acid   |
| 82.29 | Mannose                  | Fructose, Mannose and Galactose Metabolism           | Carbohydrate |
| 82.61 | Guanidinoacetate         | Creatine Metabolism                                  | Amino acid   |
| 82.64 | 1-Methylhistidine        | Histidine Metabolism                                 | Amino acid   |

---
